# Supplementary material for: Trajectories of emotional and behavioral problems from childhood to early adult life
Source: PubMed Central journal article supplement (PMC7521012; doi:10.1177/1362361320908972), 2020-03-19
Supplement: SDQ_trajectories_Supplementary_materials.pdf [file SDQ_trajectories_Supplementary_materials.pdf]

**Supplementary Figure 1**

**SNAP cohort participation over waves 1-3**

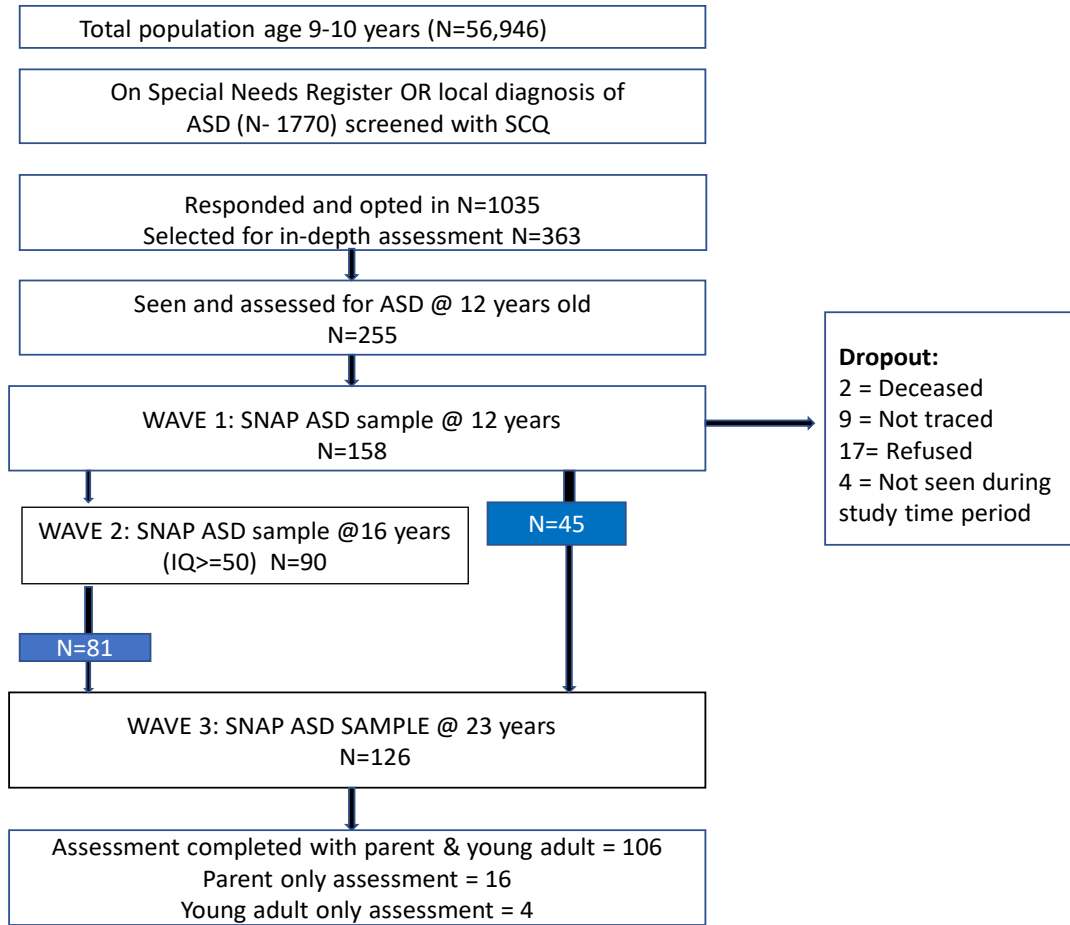

**Supplementary Table 1 – Overall tests of predictors**

|                                                                           | p-value      |
|---------------------------------------------------------------------------|--------------|
| School (non-mainstream vs mainstream)                                     | 0.698        |
| Parental education<br>(ref category: No education or O-levels equivalent) | <b>0.003</b> |
| Carstairs deprivation                                                     | <b>0.002</b> |
| ADOS G Severity Score                                                     | <b>0.031</b> |
| Behaviours in infancy (DISCO)                                             | 0.128        |
| VABS                                                                      | <b>0.006</b> |
| ADOS module 1 (ref category: ADOS module 3)                               | <b>0.014</b> |
| ADOS Module 2 (ref category: ADOS module 3)                               | <b>0.001</b> |
| Maternal GHQ total                                                        | 0.726        |
| Parent history of MH problems (Y vs N)                                    | 0.076        |
